# Supplementary material for: Water soaking in strawberry (Fragaria x ananassa) has a polygenic background and is strongly influenced by environmental factors
Source: Research Square preprint supplement (doi:10.21203/rs.3.rs-8696980/v1), 2026-02-10
Supplement: Supplementary file 1 [file 1efb4bc1b58aa213deb741c0.docx]

**Table 4** Characteristics of the linkage maps of *F.* ×*ananassa* 201409 and 201706. For each linkage group (LG), the number of markers, genetic distance and marker density was given. Linkage groups of the homoeologous groups 1-7 were named according to the recent *F.* × *ananassa* nomenclature A-D (Hardigan et al. 2021b).

|  | **201409** | | |  | **210706** | | |
| --- | --- | --- | --- | --- | --- | --- | --- |
| **LG** | **n marker** | **Genetic distance (cM)** | **Density (marker/cM)** |  | **n marker** | **Genetic distance (cM)** | **Density (marker/cM)** |
| 1A | 178 | 55.34 | 3.22 |  | 190 | 38.11 | 4.99 |
| 1B | 133 | 73.01 | 1.82 |  | 157 | 61.80 | 2.54 |
| 1C | 104 | 56.63 | 1.84 |  | 88 | 51.67 | 1.70 |
| 1D | 214 | 59.47 | 3.60 |  | 139 | 23.56 | 5.90 |
| 2A | 218 | 60.87 | 3.58 |  | 253 | 89.84 | 2.82 |
| 2B | 182 | 47.82 | 3.81 |  | 177 | 76.74 | 2.31 |
| 2C | 118 | 62.61 | 1.88 |  | 149 | 74.88 | 1.99 |
| 2D | 196 | 60.37 | 3.25 |  | 174 | 65.81 | 2.64 |
| 3A | 211 | 36.41 | 5.80 |  | 221 | 91.73 | 2.41 |
| 3B | 295 | 59.13 | 4.99 |  | 335 | 75.38 | 4.44 |
| 3C | 202 | 53.46 | 3.78 |  | 127 | 26.64 | 4.77 |
| 3D | 257 | 68.10 | 3.77 |  | 277 | 68.62 | 4.04 |
| 4A | 239 | 69.15 | 3.46 |  | 129 | 48.14 | 2.68 |
| 4B | 75 | 40.19 | 1.87 |  | 134 | 62.22 | 2.15 |
| 4C | 146 | 47.11 | 3.10 |  | 157 | 46.47 | 3.38 |
| 4D | 184 | 62.38 | 2.95 |  | 158 | 70.73 | 2.23 |
| 5A | 226 | 64.08 | 3.53 |  | 204 | 68.73 | 2.97 |
| 5B | 167 | 57.24 | 2.92 |  | 203 | 62.24 | 3.26 |
| 5C | 115 | 51.13 | 2.25 |  | 180 | 71.16 | 2.53 |
| 5D | 120 | 40.96 | 2.93 |  | 186 | 72.63 | 2.56 |
| 6A | 120 | 81.34 | 1.48 |  | 227 | 89.34 | 2.54 |
| 6B | 138 | 82.98 | 1.66 |  | 108 | 39.47 | 2.74 |
| 6C | 208 | 46.12 | 4.51 |  | 285 | 78.50 | 3.63 |
| 6D | 217 | 77.14 | 2.81 |  | 218 | 80.30 | 2.71 |
| 7A | 125 | 55.62 | 2.25 |  | 192 | 68.00 | 2.82 |
| 7B | 91 | 45.90 | 1.98 |  | 106 | 36.36 | 2.92 |
| 7C | 175 | 61.00 | 2.87 |  | 186 | 55.62 | 3.34 |
| 7D | 87 | 53.87 | 1.61 |  | 74 | 15.39 | 4.81 |
| Total | 4741 | 1578.29 | 2.98 |  | 5034 | 1710.07 | 3.14 |
