# Supplementary material for: Water soaking in strawberry (Fragaria x ananassa) has a polygenic background and is strongly influenced by environmental factors
Source: Research Square preprint supplement (doi:10.21203/rs.3.rs-8696980/v1), 2026-02-10
Supplement: Supplementary file 2 [file 388530d4db4859b429386cf4.docx]

**Table 2** Water soaking (WS) and fruit skin permeance in water uptake (Pf) phenotyped in two seasons in the F1 cross population and their parental genotypes 201049 and 210706 (number N of observed fruits, mean, standard error SE; median, minimum, maximum, coefficient of variation CV%). WS was indexed after 4 h incubation in deionized water using a 5-point rating scale: score 0, no WS; score 1, < 10% of the fruit surface area water-soaked; score 2, 10 - 35%; score 3, 36 - 60%; score 4, > 60% (Hurtado and Knoche 2021) and Pf was calculated as described in Hurtado et al. (2024)

| **WS (score)** |  |  |  |  |  |  |  |
| --- | --- | --- | --- | --- | --- | --- | --- |
| **Genotype/population** | **N** | **Year** | **Mean ± SE** | **Median** | **Min** | **Max** | **CV%** |
| 201409 | 20 | 2024 | 1.00 ± 0.15 | 1.00 | 0.00 | 3.00 | 64.89 |
|  | 10 | 2025 | 0.90 ± 0.23ns | 1.00 | 0.00 | 2.00 | 81.98 |
|  | 30 | total | 0.97 ± 0.12 | 1.00 | 0.00 | 3.00 | 69.17 |
| 210706 | 20 | 2024 | 2.55 ± 0.23 | 3.00 | 1.00 | 4.00 | 41.18 |
|  | 10 | 2025 | 3.50 ± 0.22* | 4.00 | 2.00 | 4.00 | 20.20 |
|  | 30 | total | 2.87 ± 0.19 | 3.00 | 1.00 | 4.00 | 36.34 |
| F1 population | 706 | 2024 | 1.79 ± 0.05 | 1.00 | 0.00 | 4.00 | 70.81 |
|  | 1330 | 2025 | 2.07 ± 0.03*** | 2.00 | 0.00 | 4.00 | 56.40 |
|  | 2036 | total | 1.97 ± 0.03 | 2.00 | 0.00 | 4.00 | 61.34 |
| **Pf (× 10-6 m s-1)** |  |  |  |  |  |  |  |
| **Genotype/population** | **N** | **Year** | **Mean ± SE** | **Median** | **Min** | **Max** | **CV%** |
| 201409 | 20 | 2024 | 1.09 ± 0.12 | 0.99 | 0.49 | 2.20 | 48.81 |
|  | 10 | 2025 | 1.25 ± 0.28ns | 0.88 | 0.54 | 3.11 | 70.14 |
|  | 30 | total | 1.14 ± 0.12 | 0.94 | 0.49 | 3.11 | 57.48 |
| 210706 | 20 | 2024 | 1.09 ± 0.09 | 0.89 | 0.58 | 1.94 | 38.03 |
|  | 10 | 2025 | 2.11 ± 0.22*** | 1.92 | 0.80 | 3.22 | 32.79 |
|  | 30 | total | 1.43 ± 0.13 | 1.31 | 0.58 | 3.22 | 49.41 |
| F1 population | 706 | 2024 | 1.43 ± 0.03 | 1.29 | 0.28 | 4.27 | 52.93 |
|  | 1330 | 2025 | 1.61 ± 0.02*** | 1.36 | 0.01 | 8.18 | 55.74 |
|  | 2036 | total | 1.54 ± 0.02 | 1.35 | 0.01 | 8.18 | 55.27 |

Note: Asterisks indicate significant differences of the means between both seasons (pairwise wilcoxon test, p < 0.05, *; p < 0.001, ***; p > 0.05, ns not significant)
