# Supplementary material for: Water soaking in strawberry (Fragaria x ananassa) has a polygenic background and is strongly influenced by environmental factors
Source: Research Square preprint supplement (doi:10.21203/rs.3.rs-8696980/v1), 2026-02-10
Supplement: Supplementary file 3 [file 6a1c5f8a5542a7f343eb7771.docx]

**Table 6** List of QTLs found on parental maps of *F.* × *ananassa* 210409 × 210706 F1 population for water soaking (WS) and logarithmic transformed fruit skin permeance in water uptake (log Pf) in season 2025 (n F1 = 128). Plants were grown in a high tunnel table-top system under open-field conditions. Linkage groups of the homoeologous groups 1-7 were named according to the recent *F.*× *ananassa* nomenclature A-D (Hardigan et al. 2021b). For each SNP marker with the highest LOD score, chromosome name and physical position was given, based on the *F.* × *ananassa* ˈCamarosaˈ v.1.0 genome assembly (Edger et al. 2019). Level of significance and K-value were determined using a Kruskal-Wallis test and a genome-wide (GW) and chromosome-wide (CW) LOD thresholds were calculated using a permutation test. By interval mapping, the highest LOD score (LODmax) and percentage of variance explained (Exp.%) were estimated. The QTL region, including the markers genetic position, was calculated with LODmax-1.

|  | | | | ***F*x*a* ˈCamarosaˈ** | |  | **Kruskal-Wallis** | |  | **Permutation test** | |  | **Interval mapping** | |  | **Genetic map** | |
| --- | --- | --- | --- | --- | --- | --- | --- | --- | --- | --- | --- | --- | --- | --- | --- | --- | --- |
| **Trait** | **Parent** | **QTL ID** | **Marker ID** | **Chr.** | **Position (bp)** |  | **K** | **Signif.** |  | **LODGW** | **LODCW** |  | **LODmax** | **Exp.%** |  | **Position (cM)** | **Region (cM)** |
| WS | 210409 | *qWS-1Bb-2025* | AX-184743927 | Fvb1-2 | 10752123 |  | 3.75 | * |  | 4.8 | 3.4 |  | 3.44 | 11.7 |  | 51.91 | 49.202-51.91 |
|  |  | *qWS-2A-2025* | AX-184883855 | Fvb2-2 | 4320490 |  | 14.97 | ***** |  |  | 3 |  | 3.87 | 13 |  | 17.811 | 15.694-23.129 |
|  |  | *qWS-3A-2025* | AX-184059539 | Fvb3-4 | 21846270 |  | 10.39 | *** |  |  | 3.4 |  | 3.47 | 14.3 |  | 21.376 | 19.909-21.5 |
|  |  | *qWS-7B-2025* | AX-184074753† | Fvb7-3 | 16158679 |  | 13.86 | ***** |  |  | 3.1 |  | 4.59 | 15.4 |  | 39.817 | 33.094-41.811 |
|  |  | *qWS-7C-2025* | AX-184367516† | Fvb7-1 | 29618275 |  | 4.29 | ** |  |  | 3 |  | 3.9 | 13.2 |  | 56.916 | 51.919-60.997 |
|  | 210706 | *qWS-1Bb-2025* | AX-184894612 | Fvb1-2 | 13824100 |  | 11.38 | ***** |  | 4.8 | 3.1 |  | 3.28 | 13.2 |  | 47.48 | 46.226-54.97 |
|  |  | *qWS-2A-2025* | AX-184883855 | Fvb2-2 | 4320490 |  | 14.97 | ***** |  |  | 3.1 |  | 3.88 | 13 |  | 40.719 | 39.876-46.323 |
|  |  | *qWS-7B-2025* | AX-184147044† | Fvb7-3 | 17062838 |  | 16.78 | ******* |  |  | 2.9 |  | 4.6 | 15.3 |  | 34.359 | 31.849-36.363 |
|  |  | *qWS-7C-2025* | AX-184699875 | Fvb7-1 | 29761498 |  | 10.46 | **** |  |  | 3 |  | 4.19 | 14.2 |  | 50.319 | 46.43-55.624 |
| logPf | 201409 | *qlogPf-1D-2025* | AX-184300776 | Fvb1-1 | 3477773 |  | 3.02 | * |  | 4.7 | 2.9 |  | 3.47 | 13.7 |  | 1.518 | 1.504-3.991 |
|  |  | ***qlogPf-2A-2025*** | **AX-184646139** | **Fvb2-2** | **6086274** |  | **20.21** | *********** |  |  | **3** |  | **5.08** | **16.7** |  | **21.205** | **15.694-29.919** |
|  |  | *qlogPf-7C-2025* | AX-184367516† | Fvb7-1 | 29618275 |  | 3.08 | * |  |  | 3.1 |  | 4.03 | 13.5 |  | 56.916 | 51.265-57.446 |
|  | 210706 | ***qlogPf-2A-2025*** | **AX-184646139** | **Fvb2-2** | **6086274** |  | **20.21** | *********** |  | **4.7** | **3.2** |  | **4.97** | **16.4** |  | **44.639** | **39.876-52.086** |
|  |  | *qlogPf-7C-2025* | AX-184699875 | Fvb7-1 | 29761498 |  | 10.43 | **** |  |  | 3.1 |  | 4.17 | 14 |  | 50.319 | 47.084-51.96 |

Notes: p < 0.1, *; p < 0.05, **; p < 0.01, ***; p < 0.005, ****; p < 0.001, *****; p < 0.0005, ******; p < 0.0001, *******; † Peak marker was not significant; Bold: QTL exceeded LODGW threshold; Blue: QTLs, only found in one of the parental maps
