# Supplementary material for: Water soaking in strawberry (Fragaria x ananassa) has a polygenic background and is strongly influenced by environmental factors
Source: Research Square preprint supplement (doi:10.21203/rs.3.rs-8696980/v1), 2026-02-10
Supplement: Supplementary file 4 [file 9d81c1497d420a150c0f6056.docx]

**Table 5** List of QTLs found on parental maps of *F.* × *ananassa* 210409 × 210706 F1 population for water soaking (WS) and fruit skin permeance in water uptake (Pf) in season 2024 (n F1 = 71). Plants were grown in a greenhouse. Linkage groups of the homoeologous groups 1-7 were named according to the recent *F.* × *ananassa* nomenclature A-D (Hardigan et al. 2021b). For each SNP marker with the highest LOD score, chromosome name and physical position was given, based on the *F.* × *ananassa* ˈCamarosaˈ v.1.0 genome assembly (Edger et al. 2019). Level of significance and K-value were determined using a Kruskal-Wallis test and genome-wide (GW) and chromosome-wide (CW) LOD thresholds were calculated using a permutation test. By interval mapping, the highest LOD score (LODmax) and percentage of variance explained (Exp.%) were estimated. The QTL region, including the markers genetic position, was calculated with LODmax-1.

|  | | | | ***F*x*a* ˈCamarosaˈ** | |  | **Kruskal-Wallis** | |  | **Permutation test** | |  | **Interval mapping** | |  | **Genetic map** | |
| --- | --- | --- | --- | --- | --- | --- | --- | --- | --- | --- | --- | --- | --- | --- | --- | --- | --- |
| **Trait** | **Parent** | **QTL ID** | **Marker ID** | **Chr.** | **Position (bp)** |  | **K** | **Signif.** |  | **LODGW** | **LODCW** |  | **LODmax** | **Exp.%** |  | **Position (cM)** | **Region (cM)** |
| WS | 201409 | *qWS-1Ba-2024* | AX-184907012 | Fvb1-2 | 7817305 |  | 4.75 | * |  | 5.1 | 3.5 |  | 4.61 | 43.1 |  | 22.025 | 18.241-22.025 |
|  |  | *qWS-1Bb-2024* | AX-184380336 | Fvb1-2 | 10911051 |  | 5.82 | ** |  |  | 3.5 |  | 4.24 | 24.1 |  | 50.381 | 50.381-51.91 |
|  |  | *qWS-3B-2024* | AX-184055455 | Fvb3-2 | 6813220 |  | 13.92 | ***** |  |  | 3.3 |  | 3.82 | 22 |  | 14.25 | 2.528-29.606 |
|  |  | *qWS-4C-2024* | AX-184740352 | Fvb4-2 | 2371522 |  | 11.89 | **** |  |  | 2.9 |  | 3.13 | 18.4 |  | 6.635 | 4.316-9.801 |
|  |  | *qWS-5A-2024* | AX-184113813 | Fvb5-1 | 29120201 |  | 12.83 | **** |  |  | 3.2 |  | 3.42 | 19.9 |  | 63.937 | 58.676-64.075 |
|  |  | *qWS-7C-2024* | AX-184061493† | Fvb7-1 | 31024238 |  | 3.35 | * |  |  | 3.1 |  | 3.18 | 18.4 |  | 56.135 | 54.32-60.997 |
|  | 210706 | *qWS-1Ba-2024* | AX-184537513 | Fvb1-2 | 7477259 |  | 5.39 | * |  | 5.2 | 3.2 |  | 3.88 | 22.4 |  | 28.405 | 18.361-33.77 |
|  |  | *qWS-1Bb-2024* | AX-184915866 | Fvb1-2 | 12257932 |  | 12.36 | ****** |  |  | 3.2 |  | 4.34 | 25.7 |  | 44.003 | 43.792-47.011 |
|  |  | *qWS-1C-2024* | AX-184279098 | Fvb1-3 | 9872635 |  | 4.97 | * |  |  | 3.5 |  | 3.63 | 40.8 |  | 33.892 | 31.399-34.013 |
|  |  | *qWS-3B-2024* | AX-184055455 | Fvb3-2 | 6813220 |  | 13.92 | ***** |  |  | 3.6 |  | 4.15 | 23.7 |  | 22.495 | 9.577-28.519 |
|  |  | *qWS-4C-2024* | AX-184593687 | Fvb4-2 | 2397714 |  | 11.61 | **** |  |  | 3 |  | 3.13 | 18.4 |  | 7.566 | 4.657-11.734 |
|  |  | *qWS-5A-2024* | AX-184113813 | Fvb5-1 | 29120201 |  | 12.83 | **** |  |  | 3.2 |  | 3.25 | 19 |  | 68.33 | 63.479-68.725 |
| Pf | 201409 | *qPf-1Ba-2024* | AX-184065984† | Fvb1-2 | 7214467 |  | 6.32 | ** |  | 5.1 | 3.6 |  | 4.21 | 24 |  | 18.323 | 14.567-22.045 |
|  |  | *qPf-3B-2024* | AX-184505625 | Fvb3-2 | 4434681 |  | 12.75 | **** |  |  | 3.3 |  | 4.17 | 23.7 |  | 4.195 | 2.125-19.774 |
|  |  | *qPf-4C-2024* | AX-184428375 | Fvb4-2 | 2303388 |  | 10.27 | *** |  |  | 3 |  | 3.13 | 18.4 |  | 5.755 | 3.115-12.158 |
|  |  | *qPf-5A-2024* | AX-184113813 | Fvb5-1 | 29120201 |  | 12.68 | **** |  |  | 3.2 |  | 3.25 | 19 |  | 63.937 | 59.663-64.075 |
|  | 210706 | ***qPf-1Ba-2024*** | **AX-184537513** | **Fvb1-2** | **7477259** |  | **11.40** | ******** |  | **5** | **3.2** |  | **5.18** | **28.6** |  | **28.405** | **27.082-28.489** |
|  |  | *qPf-1Bb-2024* | AX-184545559 | Fvb1-2 | 12402863 |  | 9.03 | **** |  |  |  |  | 3.6 | 21.9 |  | 43.792 | 43.8-44.0 |
|  |  | *qPf-3B-2024* | AX-184177183 | Fvb3-2 | 3858636 |  | 8.71 | **** |  |  | 3.5 |  | 4.1 | 23.4 |  | 9.78 | 7.811-14.449 |
|  |  | *qPf-4C-2024* | AX-184428375 | Fvb4-2 | 2303388 |  | 10.27 | *** |  |  | 3 |  | 3.13 | 18.4 |  | 6.777 | 4.041-13.422 |
|  |  | *qPf-5A-2024* | AX-184113813 | Fvb5-1 | 29120201 |  | 12.68 | **** |  |  | 3.1 |  | 3.18 | 18.6 |  | 68.33 | 64.518-68.725 |

Notes: p < 0.1, *; p < 0.05, **; p < 0.01, ***; p < 0.005, ****; p < 0.001, *****; p < 0.0005, ******; p < 0.0001, *******; † Peak marker was not significant; Bold: QTL exceeded LODGW threshold; Blue: QTLs, only found in one of the parents
