# Supplementary material for: Water soaking in strawberry (Fragaria x ananassa) has a polygenic background and is strongly influenced by environmental factors
Source: Research Square preprint supplement (doi:10.21203/rs.3.rs-8696980/v1), 2026-02-10
Supplement: Supplementary file 5 [file a9d9a7b507014ab05fa86986.docx]

**Table 3** Broad sense heritability H2 of water soaking (WS) and fruit skin permeance in water uptake (Pf), phenotyped in two seasons in a *F*. *ananassa* F1 201409 × 210706 cross population (VG = genetic variance or variance among genotype means; VG×E = variance of genotype × environment interaction; VE = residual variance within the genotypes). Computation was carried out with the package *lme4breeding* in R version 4.4.1 (Bates et al. 2015; Covarrubias-Pazaran 2025).

| **Trait** | **Year** | **H2** | **VG** | **VG×E** | **VE** |
| --- | --- | --- | --- | --- | --- |
| WS | 2024 | 0.389 | 0.629 | - | 0.987 |
|  | 2025 | 0.332 | 0.544 | - | 0.986 |
|  | total | 0.489 | 0.327 | 0.243 | 0.883 |
| Pf | 2024 | 0.441 | 2.529 · 10-13 | - | 3.212 · 10-13 |
|  | 2025 | 0.456 | 2.801 · 10-13 | - | 4.659 · 10-13 |
|  | total | 0.570 | 2.055 · 10-13 | 0.952 · 10-13 | 4.282 · 10-13 |
