# Supplementary material for: Water soaking in strawberry (Fragaria x ananassa) has a polygenic background and is strongly influenced by environmental factors
Source: Research Square preprint supplement (doi:10.21203/rs.3.rs-8696980/v1), 2026-02-10
Supplement: Supplementary file 6 [file cd020b0696efa6bab24b5b8a.docx]

**Table 1** SSR marker analysis of the F1 201409 × 210706 cross population with number of alleles (na), allele size (bp) and relative allele frequency, expected heterozygosity (Hexp) and polymorphic information content (PIC), based on PCR fragment analysis and the *polysat* analysis (Clark and Jasieniuk 2011; Clark and Schreier 2017)

|  |  | **Allele size bp (allele frequency)** | | | | | |  |  |
| --- | --- | --- | --- | --- | --- | --- | --- | --- | --- |
| **Marker** | **na** | **Allele 1** | **Allele 2** | **Allele 3** | **Allele 4** | **Allele 5** | **Allele 6** | **Hexp** | **PIC** |
| UFFa_13C07p | 2 | 164m (0.61) | 173p (0.39) |  |  |  |  | 0.48 | 0.36 |
| CFVCT028p | 2 | 141m (0.83) | 143p (0.17) ♂ |  |  |  |  | 0.28 | 0.24 |
| UDF-001p | 4 | 162p (0.17) ♂ | 165p (0.40) ♀ | 167p (0.11) ♂ | 169p (0.33) ♀ |  |  | 0.69 | 0.64 |
| UFFa_11G07p | 3 | 172p (0.39) | 174p (0.13) ♂ | 182m (0.48) |  |  |  | 0.60 | 0.52 |
| UAFv7344p | 3 | 206p (0.28) | 207p (0.11) | 209m (0.60) |  |  |  | 0.54 | 0.47 |
| SF-A01m | 3 | 171m (0.50) | 174 (0.002) | 175m (0.50) |  |  |  | 0.50 | 0.38 |
| UFFa_09E12p | 2 | 187p (0.12) ♂ | 197m (0.88) |  |  |  |  | 0.22 | 0.19 |
| EMFv030m | 1 | 192m (1.00) |  |  |  |  |  | 0.00 | 0.00 |
| ChFaM036p | 3 | 0p (0.004) ♂ | 213p (0.51) ♀ | 220p (0.49) ♀ |  |  |  | 0.50 | 0.38 |
| UDF-009p | 6 | 144p (0.20) | 145p (0.18) | 148p (0.07) ♂ | 163p (0.16) ♀ | 171p (0.20) | 181p (0.20) | 0.82 | 0.80 |
| UDF-004p | 6 | 131m (0.21) | 133m (0.19) | 135p (0.17) | 139p (0.12) ♀ | 141m (0.18) | 154p (0.14) | 0.83 | 0.80 |
| EMFv017p | 2 | 199p (0.29) ♀ | 207m (0.71) |  |  |  |  | 0.41 | 0.33 |
| UFFa_01D03m | 3 | 240m (0.50) | 243m (0.50) | 246 (0.01) |  |  |  | 0.51 | 0.39 |
| UAFv8316m | 3 | 234m (0.33) | 236m (0.33) | 238m (0.33) |  |  |  | 0.67 | 0.59 |
| MCAD_FAC_001p | 3 | 189p (0.15) ♂ | 191p (0.12) ♂ | 202m (0.73) ♀ |  |  |  | 0.43 | 0.39 |
| ChFaM138m | 2 | 311m (0.56) | 314m (0.44) |  |  |  |  | 0.49 | 0.37 |
| EMFv001m | 1 | 230m (1.00) |  |  |  |  |  | 0.00 | 0.00 |
| UFFa_03C04p | 4 | 240m (0.31) | 246m (0.30) | 249p (0.21) ♀ | 252p (0.18) ♀ |  |  | 0.74 | 0.69 |
| ChFaM078p | 2 | 252p (0.61) | 255p (0.39) |  |  |  |  | 0.48 | 0.36 |

Notes: m = monomorphic; p = polymorphic; ♀ = alleles, inherited only from 201409; ♂ = alleles, inherited only from 210706
